# Supplementary material for: Effect of meal composition on postprandial lipid concentrations and lipoprotein particle numbers: A randomized cross-over study
Source: PLoS One. 2017 Feb 21;12(2):e0172732. doi: 10.1371/journal.pone.0172732 (PMC5319704; doi:10.1371/journal.pone.0172732)
Supplement: S3 File — Study data in Excel format. (XLSX) [file pone.0172732.s003.xlsx]

## Sheet: all data
Age	Gender	Height (m)	Scrwt	ScrBMI	ScrWC	DEXA%BF	HMUWt	HPWt	HP_TC_PRE	HP_TC_30	HP_TC_60	HP_TC_120	HP_TC_180	HP_TC_AUC	HP_LDLC_PRE	HP_LDLC_30	HP_LDLC_60	HP_LDLC_120	HP_LDLC_180	HP_LDLC_AUC	HP_HDLC_PRE	HP_HDLC_30	HP_HDLC_60	HP_HDLC_120	HP_HDLC_180	HP_HDLC_AUC	HP_TG_PRE	HP_TG_30	HP_TG_60	HP_TG_120	HP_TG_180	HP_TG_AUC	HP_NonHDL_PRE	HP_NonHDL_30	HP_NonHDL_60	HP_NonHDL_120	HP_NonHDL_180	HP_NonHDL_AUC	HP_TC/HDL_Pre	HP_TC/HDL_30	HP_TC/HDL_60	HP_TC/HDL_120	HP_TC/HDL_180	HP_TC/HDL_AUC	HMU_TC_PRE	HMU_TC_30	HMU_TC_60	HMU_TC_120	HMU_TC_180
23.7	1	1.778	76.6	24.2307	85	23.5	75.2	75.5	175	191	177	173	173	531.5	118	127	117	116	119	356.25	43	47	43	44	44	132.5	79	72	123	79	62	258	132	144	134	129	129	399	4.06977	4.06383	4.11628	3.93182	3.93182	12.0343	180	187	183	192	183
20.4	2	1.675	64.5	22.9895	77	27.8	63.3	62.9	110	121	131	116	110	357.25	53	55	58	55	51	164.75	44	46	50	46	44	139.5	43	54	66	60	55	174.75	66	75	81	70	66	217.75	2.5	2.63043	2.62	2.52174	2.5	7.67696	115	115	123	120	115
64.4	2	1.7	62.1	21.4879	85.5	33.2	62	62.6	188	193	191	184	194	567.75	108	110	108	108	114	328	57	59	58	56	60	173.25	107	102	112	119	164	362.75	131	134	133	128	134	394.5	3.29825	3.27119	3.2931	3.28571	3.23333	9.83236	202	207	202	200	198
22	1	1.68	65.1	23.0655	79	16.4	65.4	65.1	156	168	167	165	163	494.75	92	94	92	95	93	280.5	55	59	58	58	57	173.25	42	53	68	72	85	202.5	101	109	109	107	106	321.5	2.83636	2.84746	2.87931	2.84483	2.85965	8.56695	134	136	141	142	139
18.3	2	1.6002	62.5	24.408	79	28.4	60.55	61.1	120	124	123	117	137	369.75	66	66	63	61	74	194.75	45	46	45	42	49	134.5	52	65	78	88	90	237	75	78	78	75	88	235.25	2.66667	2.69565	2.73333	2.78571	2.79592	8.24817	118	122	123	123	129
23.5	1	1.78	80	25.2493	87	23.4	79.9	79.6	131	141	136	129	130	399.25	80	82	80	77	77	236.5	37	40	38	37	37	113.25	63	79	88	95	99	265.75	94	101	98	92	93	286	3.54054	3.525	3.57895	3.48649	3.51351	10.5751	147	145	143	146	147
21.6	1	1.77	78.8	25.1524	86	13.8	79	78.79	128	134	130	130	123	388	68	67	65	67	64	198.25	51	53	51	53	50	155.5	39	42	45	42	46	129.5	77	81	79	77	73	232.5	2.5098	2.5283	2.54902	2.45283	2.46	7.4862	119	122	122	118	119
33	1	1.82	67.5	20.378	78	17.4	69.1	68	179	193	195	191	194	575.5	104	106	108	109	108	323	53	56	57	56	56	168	89	107	130	147	178	409.25	126	137	138	135	138	407.5	3.37736	3.44643	3.42105	3.41071	3.46429	10.2762	189	192	203	206	199
29.1	2	1.63	60.6	22.8085	75.4	16.4	61.4	60.6	140	148	152	148	145	443.5	68	70	71	72	70	212.25	53	56	58	58	57	171.25	57	61	73	65	66	197.5	87	92	94	90	88	272.25	2.64151	2.64286	2.62069	2.55172	2.54386	7.77098	122	127	132	137	135
40.7	1	1.8	74.8	23.0864	82	11.9	74.8	73.9	137	133	131	131	131	395.5	60	58	57	60	58	175.75	53	56	54	53	52	160.75	71	76	90	85	73	244.75	84	77	77	78	79	234.75	2.58491	2.375	2.42593	2.4717	2.51923	7.38448	140	133	139	150	146
26.3	1	1.78	88.1	27.8058	91.5	24.4	91.8	90	169	166	170	166	176	506.75	107	107	103	101	104	310.5	33	31	31	33	34	97	173	167	191	225	264	627	136	135	139	133	142	409.75	5.12121	5.35484	5.48387	5.0303	5.17647	15.6892	161	153	153	168	167
50.4	1	1.74	67.8	22.394	88	35.4	68.5	68.4	138	148	138	140	141	422.5	63	65	61	63	63	188.5	53	56	52	52	52	158.25	176	213	230	289	287	755.5	85	92	86	88	89	264.25	2.60377	2.64286	2.65385	2.69231	2.71154	8.01083	145	155	152	147	155
58.1	2	1.69	68.6	24.0188	81.5	32.5	68.3	68.4	173	183	184	172	175	532.25	102	101	102	99	100	301.5	58	59	60	56	58	174	67	67	81	83	102	245	115	124	124	116	117	358.25	2.98276	3.10169	3.06667	3.07143	3.01724	9.17659	171	181	179	177	170
21.6	1	1.82	81.9	24.7253	90.5	24.9	81.4	82.1	154	157	148	149	146	450	97	94	90	90	88	272.75	42	43	40	41	41	123.5	88	101	112	122	148	352.5	112	114	108	108	105	326.5	3.66667	3.65116	3.7	3.63415	3.56098	10.9319	154	158	154	154	153
41.7	2	1.739	61.5	20.3365	75.5	28.9	61.9	63.9	162	171	181	172	171	519.25	57	59	62	59	59	178.75	82	85	87	85	86	256.25	74	73	81	76	82	232.75	80	86	94	87	85	263	1.97561	2.01176	2.08046	2.02353	1.98837	6.07785	155	169	165	162	167
20.6	1	1.76	76	24.5351	82.5	17.4	76.1	75.9	138	136	131	134	129	399.25	60	57	54	58	55	169.5	68	68	65	67	64	198.75	66	94	100	68	62	237.5	70	68	66	67	65	200.5	2.02941	2	2.01538	2	2.01562	6.0267	144	151	143	142	148
56.6	2	1.524	52.2	22.475	76	36.3	52.8	52.5	203	200	195	196	193	589.5	122	113	113	117	114	345.75	62	63	59	61	58	181.25	84	94	104	115	151	336.5	141	137	136	135	135	408.25	3.27419	3.1746	3.30508	3.21311	3.32759	9.76157	194	202	199	198	194
33.7	1	1.676	74.8	26.6289	93.3	24.5	74.4	73.6	195	194	192	192	189	576.25	133	126	122	130	124	379.75	49	49	49	47	47	144	70	66	76	92	107	253	146	145	143	145	142	432.25	3.97959	3.95918	3.91837	4.08511	4.02128	12.009	202	206	206	205	214
59.8	1	1.83	87.8	26.2176	92	23.7	87.8	87.7	169	182	176	174	173	525.75	106	112	108	108	107	325	48	53	50	49	48	149	121	120	148	156	169	441.75	121	129	126	125	125	376.75	3.52083	3.43396	3.52	3.55102	3.60417	10.5903	163	161	170	162	163
23.4	2	1.6	53.6	20.9375	61.5	26.5	52.4	53.6	149	157	158	150	151	459.75	80	83	82	81	82	245	53	57	58	54	55	166.75	47	53	60	52	60	165.25	96	100	100	96	96	293	2.81132	2.75439	2.72414	2.77778	2.74545	8.27363	131	140	140	132	131
51.1	1	1.854	86.59	25.1912	90.5	19.9	86.6	85.8	113	110	112	122	119	348.75	66	63	65	70	66	199.75	40	40	40	43	42	124	52	50	59	84	84	208.25	73	70	72	79	77	224.75	2.825	2.75	2.8	2.83721	2.83333	8.43513	103	106	103	110	107
52.7	2	1.58	57	22.8329	79.5	42.2	58.4	58.5	186	181	188	198	188	570	97	94	95	107	95	297	64	65	67	73	64	203.75	86	77	99	62	171	281.75	122	116	121	125	124	366.25	2.90625	2.78462	2.80597	2.71233	2.9375	8.40443	204	206	202	206	202
43.5	2	1.65	55.1	20.2388	72	36.2	55	55.5	199	189	190	200	192	582.75	106	104	97	107	104	310.25	72	73	66	75	73	215.5	60	58	191	68	82	296.25	127	116	124	125	119	367.25	2.76389	2.58904	2.87879	2.66667	2.63014	8.12632	206	206	200	200	207
33.7	2	1.58	61.8	24.8	75.5	42.5	61.5	62.3	192	205	206	203	204	610	119	126	125	123	126	372.5	58	62	62	61	63	184.5	50	55	70	68	75	198	134	143	144	142	141	425.5	3.31034	3.30645	3.32258	3.32787	3.2381	9.91966	216	226	229	217	232
[truncated: 111 more columns]
